# Supplementary material for: Biosorption Study of Methylene Blue (MB) and Brilliant Red Remazol (BRR) by Coconut Dregs
Source: Hindawi journal article supplement (doi:10.1155/2022/8153617), 2022-01-01
Supplement: f1 [file 8153617.f1.docx]

**Supplementary Data**

Experimental Results for Batch Mode Adsorption Studies of MB Dye

| Run | Contact Time (min) | Adsorbent Dosage (g) | Initial Concentration (mg/L) | pH | Adsorption Capacity (mg/g) |
| --- | --- | --- | --- | --- | --- |
| 1 | 240 | 1.50 | 50 | 11 | 1.9531 |
| 2 | 30 | 1.50 | 50 | 7 | 1.1457 |
| 3 | 135 | 0.88 | 35 | 9 | 2.5608 |
| 4 | 30 | 1.50 | 20 | 7 | 0.6321 |
| 5 | 240 | 0.25 | 20 | 11 | 6.6815 |
| 6 | 240 | 1.50 | 20 | 7 | 1.0345 |
| 7 | 30 | 1.50 | 50 | 11 | 2.0568 |
| 8 | 30 | 1.50 | 20 | 11 | 0.7975 |
| 9 | 240 | 0.25 | 20 | 7 | 6.3852 |
| 10 | 30 | 0.25 | 20 | 11 | 4.1777 |
| 11 | 30 | 1.50 | 20 | 11 | 0.7901 |
| 12 | 240 | 1.50 | 50 | 7 | 1.9012 |
| 13 | 240 | 1.50 | 20 | 7 | 1.0617 |
| 14 | 30 | 0.25 | 20 | 7 | 3.837 |
| 15 | 240 | 0.25 | 50 | 7 | 9.0222 |
| 16 | 30 | 1.50 | 50 | 11 | 1.3209 |
| 17 | 30 | 0.25 | 20 | 7 | 3.8667 |
| 18 | 30 | 0.25 | 20 | 11 | 4.2074 |
| 19 | 30 | 0.25 | 50 | 7 | 6.7111 |
| 20 | 240 | 0.25 | 20 | 11 | 6.6519 |
| 21 | 30 | 1.50 | 20 | 7 | 0.6247 |
| 22 | 30 | 1.50 | 50 | 7 | 1.1432 |
| 23 | 240 | 0.25 | 20 | 7 | 6.3111 |
| 24 | 30 | 0.25 | 50 | 11 | 7.1704 |
| 25 | 135 | 0.88 | 35 | 9 | 2.5524 |
| 26 | 240 | 1.50 | 50 | 7 | 1.9062 |
| 27 | 240 | 0.25 | 50 | 7 | 8.9778 |
| 28 | 135 | 0.88 | 35 | 9 | 2.5439 |
| 29 | 240 | 0.25 | 50 | 11 | 9.3778 |
| 30 | 240 | 1.50 | 50 | 11 | 1.9555 |
| 31 | 240 | 1.50 | 20 | 11 | 1.0864 |
| 32 | 240 | 1.50 | 20 | 11 | 1.0914 |
| 33 | 30 | 0.25 | 50 | 11 | 7.1407 |
| 34 | 30 | 0.25 | 50 | 7 | 6.6667 |
| 35 | 240 | 0.25 | 50 | 11 | 9.3482 |

Experimental Result for Batch Mode Adsorption Studies of BRR Dye

| Run | Contact Time (min) | Adsorbent Dosage (g) | Initial Concentration (mg/L) | pH | Adsorption Capacity (mg/g) |
| --- | --- | --- | --- | --- | --- |
| 1 | 105 | 0.88 | 35 | 4.5 | 0.9342 |
| 2 | 180 | 0.25 | 50 | 7 | 4.7826 |
| 3 | 30 | 0.25 | 50 | 2 | 2.4872 |
| 4 | 30 | 1.50 | 50 | 7 | 0.4087 |
| 5 | 30 | 0.25 | 20 | 7 | 0.9565 |
| 6 | 30 | 0.25 | 20 | 2 | 0.9913 |
| 7 | 30 | 0.25 | 20 | 7 | 0.9391 |
| 8 | 180 | 1.50 | 50 | 7 | 0.8754 |
| 9 | 180 | 0.25 | 20 | 7 | 3.2348 |
| 10 | 180 | 1.50 | 50 | 7 | 0.8638 |
| 11 | 180 | 0.25 | 20 | 2 | 4.4348 |
| 12 | 105 | 0.88 | 35 | 4.5 | 0.9193 |
| 13 | 180 | 0.25 | 50 | 2 | 5.2348 |
| 14 | 180 | 0.25 | 20 | 7 | 3.1652 |
| 15 | 180 | 0.25 | 20 | 2 | 4.5739 |
| 16 | 180 | 1.50 | 50 | 2 | 0.9014 |
| 17 | 30 | 0.25 | 20 | 2 | 0.9739 |
| 18 | 180 | 0.25 | 50 | 7 | 4.7478 |
| 19 | 30 | 0.25 | 50 | 2 | 2.2435 |
| 20 | 180 | 1.50 | 20 | 7 | 0.7391 |
| 21 | 30 | 1.50 | 20 | 2 | 0.3304 |
| 22 | 180 | 1.50 | 20 | 7 | 0.7275 |
| 23 | 180 | 1.50 | 20 | 2 | 0.8319 |
| 24 | 30 | 1.50 | 50 | 2 | 0.5884 |
| 25 | 30 | 0.25 | 50 | 7 | 1.0087 |
| 26 | 180 | 1.50 | 50 | 2 | 0.9072 |
| 27 | 180 | 1.50 | 20 | 2 | 0.8493 |
| 28 | 30 | 1.50 | 20 | 7 | 0.1884 |
| 29 | 30 | 1.50 | 20 | 2 | 0.3362 |
| 30 | 180 | 0.25 | 50 | 2 | 5.0957 |
| 31 | 105 | 0.88 | 35 | 4.5 | 0.9143 |
| 32 | 30 | 0.25 | 50 | 7 | 1.0957 |
| 33 | 30 | 1.50 | 50 | 2 | 0.5536 |
| 34 | 30 | 1.50 | 50 | 7 | 0.3942 |
| 35 | 30 | 1.50 | 20 | 7 | 0.2116 |

Optimal Design for Highest MB Adsorption Capacity

| Name | Goal | Lower  Limit | Upper  Limit | Lower  Weight | Upper  Weight | Importance |
| --- | --- | --- | --- | --- | --- | --- |
| Time | is in range | 30 | 240 | 1 | 1 | 3 |
| Dosage | is in range | 0.25 | 1.5 | 1 | 1 | 3 |
| Concentration | is in range | 20 | 50 | 1 | 1 | 3 |
| pH | is in range | 7 | 11 | 1 | 1 | 3 |
| Adsorption Capacity | maximize | 0.625 | 9.378 | 1 | 1 | 3 |
| **Number** | **Time** | **Dosage** | **Concen-tration** | **pH** | **Adsorption Capacity** | **Desirability** |
| 1 | 239.935 | 0.250 | 49.990 | 10.995 | 9.378 | 1 |

Optimal Design for Highest BRR Adsorption Capacity

| Name | Goal | Lower  Limit | Upper  Limit | Lower  Weight | Upper  Weight | Importance |
| --- | --- | --- | --- | --- | --- | --- |
| Time | is in range | 30 | 180 | 1 | 1 | 3 |
| Dosage | is in range | 0.25 | 1.5 | 1 | 1 | 3 |
| Concentration | is in range | 20 | 50 | 1 | 1 | 3 |
| pH | is in range | 2 | 7 | 1 | 1 | 3 |
| Adsorption Capacity | maximize | 0.188 | 5.235 | 1 | 1 | 3 |
| **Number** | **Time** | **Dosage** | **Concen-tration** | **pH** | **Adsorption Capacity** | **Desirability** |
| 1 | 179.824 | 0.254 | 49.952 | 2.003 | 5.236 | 1 |
